# Supplementary material for: Adrenal Insufficiency in ASEAN: Barriers and Variations in Diagnosis and Management
Source: Research Square preprint supplement (doi:10.21203/rs.3.rs-7575544/v1), 2025-09-30
Supplement: Supplementary file 1 [file 1dda2f5beb463aac5719906a.docx]

**Supplementary Appendix 1**

**Survey Questionnaire:**

**Challenges in the diagnosis and management of adrenal insufficiency in ASEAN countries**

Diagnosis and management of adrenal insufficiency has always been a challenge in clinical practice. Despite the availability of international guidelines for management of adrenal insufficiency, some countries and some centers, may not have the necessary infrastructure, o expertise to accurately diagnose and manage the condition. Hence, we aim to assess the healthcare needs in various regions of the world, when managing adrenal insufficiency.

This survey will take approximately 15 minutes of your time. Participating this survey is entirely voluntary and your responses will be kept confidential and will only be reported in aggregated format. We would be grateful if you could complete all questions. There is no right or wrong answers. If you are unsure about the responses, please choose the one that appears most relevant and most appropriate in your clinical experience and in your practice.

**Specialist profile**

1. What is your specialty?
   1. Endocrinologist
   2. Non-endocrinologist
2. If you are non-endocrinologist, please specify your area of specialty: ____________________________________
3. Where do you currently practice (you can pick more than one answer)?
   1. Public teaching hospital
   2. Public non-teaching hospital
   3. Private hospital
   4. Others: Please specify __________________
4. Do you practice in an urban city or rural area?
   1. Urban city
   2. Rural area
5. Which country are you currently practicing in ?
   1. Bangladesh
   2. Brunei
   3. Cambodia
   4. India
   5. Malaysia
   6. Mynamar
   7. Pakistan
   8. Phillippines
   9. Singapore
   10. Thailand
   11. Vietnam
   12. Others, please specify: ___________________
6. Please tell us your professional grade
   1. Senior consultant
   2. Consultant
   3. Registrar in training/Resident
   4. Senior House Officer/Medical officer
   5. Endocrine Specialist Nurse

**Aetiologies and presenting features of adrenal insufficiency**

1. How many patients with adrenal insufficiency are currently being seen in your practice, in the last 1 year (please provide an estimate of the total numbers per year)
   1. Number of patients with adrenal insufficiency seen in last 1 year: _________
2. Can you provide an estimate of the number of patients presenting with adrenal insufficiency to your practice on a weekly basis?
   1. Number of patients with features of adrenal insufficiency per week: _________
3. What are the common reasons for referring patients with suspected adrenal insufficiency to you? (Please choose three and you can choose more than one option
   1. Primary adrenal insufficiency
   2. Secondary adrenal insufficiency due to pituitary cortisol deficiency
   3. Adrenal insufficiency due to longstanding/previous steroid use (due to other conditions e.g. rheumatoid arthritis, asthma, COVID)
   4. Adrenal insufficiency due to use of traditional medicine/herbal remedies with steroid content
   5. Patients with previous adrenalectomies
   6. Adrenal insufficiency due to other causes e.g. infection such as tuberculosis, HIV
   7. Adrenal insufficiency due to infiltrative causes such as adrenal metastasis, sarcoidosis
   8. Drug induced e.g. rifampicin, phenytoin, ketoconazole, immune checkpoint inhibitors (e.g. Pembrolizumab)
   9. Other: Please specify: _______________
4. Could you estimate the percentage of patients with adrenal insufficiency due to the following aetiologies in your practice?
   1. Primary adrenal insufficiency _________
   2. Secondary adrenal insufficiency due to pituitary cortisol deficiency ________
   3. Adrenal insufficiency due to longstanding/previous steroid use (due to other conditions e.g. rheumatoid arthritis, asthma, COVID) ___________
   4. Adrenal insufficiency due to use of traditional medicine/herbal remedies/topical medication with steroid content ____________
   5. Patients with previous adrenalectomies ____________
   6. Adrenal insufficiency due to other causes e.g. infection such as tuberculosis, HIV ________________
   7. Adrenal insufficiency due to infiltrative causes such as adrenal metastasis, sarcoidosis _____________
   8. Drug induced e.g. rifampicin, phenytoin, ketoconazole, immune checkpoint inhibitors (e.g. Pembrolizumab) ____________
   9. Others (optional): _____
5. Which of the following are the common presenting symptoms in your patients with adrenal insufficiency? Responses (never/sometimes/often/very often/not sure)
   1. Nausea
   2. Fatigue
   3. Hypoglycaemia
   4. Lightheadedness
   5. Diarrhoea/vomiting/abdominal pain
   6. Salt craving
   7. Unintentional weight loss
   8. Self-reported increase in skin pigmentation
   9. Hypotension (persistent and unexplained)
   10. Others
6. How common did your patients with adrenal insufficiency present with nausea?
   1. Never
   2. Sometimes
   3. Often
   4. Very often
   5. Unsure
7. How common did your patients with adrenal insufficiency present with fatigure?
   1. Never
   2. Sometimes
   3. Often
   4. Very often
   5. Unsure
8. How common did your patients with adrenal insufficiency present with hypoglycaemia?
   1. Never
   2. Sometimes
   3. Often
   4. Very often
   5. Unsure
9. How common did your patients with adrenal insufficiency present with lightheadedness/postural symptoms?
   1. Never
   2. Sometimes
   3. Often
   4. Very often
   5. Unsure
10. How common did your patients with adrenal insufficiency present with diarrrhoea/vomiting/gastrointestinal symptoms?
    1. Never
    2. Sometimes
    3. Often
    4. Very often
    5. Unsure
11. How common did your patients with adrenal insufficiency present with salt craving symptom?
    1. Never
    2. Sometimes
    3. Often
    4. Very often
    5. Unsure
12. How common did your patients with adrenal insufficiency present with unintentional weight loss symptoms?
    1. Never
    2. Sometimes
    3. Often
    4. Very often
    5. Unsure
13. How common did your patients with adrenal insufficiency present with self-reported increase in skin pigmentation?
    1. Never
    2. Sometimes
    3. Often
    4. Very often
    5. Unsure
14. How common did your patients with adrenal insufficiency present with persistent and unexplained hypotension?
    1. Never
    2. Sometimes
    3. Often
    4. Very often
    5. Unsure
15. In your patients with Primary Adrenal Insufficiency, how many, in the past 1 year also have:
    1. Type 1 diabetes mellitus;
    2. Hypothyroidism;
    3. Graves’ disease;
    4. Pernicious anaemia;
    5. Premature ovarian failure
16. How do you normally confirm the diagnosis of adrenal insufficiency in your practice?
    1. An early morning cortisol level (between 0800am to 1000am)
    2. A paired early morning cortisol level (between 0800am to 1000am) and serum ACTH level
    3. A 250-micrograms short synacthen test (any time during the day)
    4. A morning 250 micrograms-short synacthen test (0800am to 1200 pm)
    5. A 1 microgram short synacthen test
    6. Biochemical findings of low sodium and high potassium.
    7. Presenting clinical symptoms only
17. How do you normally confirm the diagnosis of adrenal insufficiency in your practice?
    1. An early morning cortisol level (between 0800am to 1000am)
    2. A paired early morning cortisol level (between 0800am to 1000am) and serum ACTH level
    3. A 250-micrograms short synacthen test (any time during the day)
    4. A morning 250 micrograms-short synacthen test (0800am to 1200 pm)
    5. A 1 microgram short synacthen test
    6. Biochemical findings of low sodium and high potassium.
    7. Presenting clinical symptoms only

1. In the last year, how many of the patients you diagnosed with adrenal insufficiency had an initial presentation of adrenal crisis?
2. In the patients with adrenal insufficiency, what basal cortisol level do you use to diagnose adrenal sufficiency?
   1. <550nmol/L or 19.9 micrograms/dl
   2. <500nmol/L or 18.1 micrograms/dl
   3. <450nmol/L or 16.3 micrograms/dl
   4. <420nmol/L or 15.2 micrograms/dl
   5. <400nmol/L or 14.4 micrograms/dl
   6. <300nmol/L or 10.8 micrograms/dl
   7. <200nmol/L or 7.3 micrograms/dl
   8. Others: Please specify and provide reasons:
3. What stimulated cortisol level (after Synacthen) would you use to determine adrenal sufficiency in your patient group?
   1. ≥550nmol/L or 19.9 micrograms/dl
   2. ≥500nmol/L or 18.1 micrograms/dl
   3. ≥450nmol/L or 16.2 micrograms/dl
   4. ≥420nmol/L or 15.2 micrograms/dl
   5. ≥400nmol/L or 14.5 micrograms/dl
   6. ≥300nmol/L or 10.9 micrograms/dl
   7. ≥200nmol/L or 7.3 micrograms/dl
   8. Others: __________
4. In the patients with adrenal insufficiency, do you only a stimulated 30-minutes serum cortisol level or a stimulated 60-minutes cortisol level or both?
   1. 30-minutes cortisol level
   2. 60-minutes cortisol level
   3. Both
   4. Others:_________
5. How do you manage unreliable or indeterminate SST in your centre?
   1. Repeat another SST
   2. Ignore the results and just start treatment with steroid
   3. Insulin tolerance test
   4. Metyrapone stimulation test
   5. Glucagon stimulation test
   6. Early morning salivary cortisone
   7. Others: ­­­­­­­­­­­­­­­___________________________
6. How often do you perform the following confirmatory test in your institution in the last year to diagnose secondary adrenal insufficiency?
   1. Insulin tolerance test: ­­­­­­­­­­­­­­­______________
   2. Glucagon stimulation test: _____________
   3. 1 microgram Short synacthen test: ______________
   4. Long synacthen test:___________
   5. 250 micrograms short synacthen test: _____________
7. What are the perceived difficulties in the diagnosis of adrenal insufficiency in your practice? (you can choose more than one option)
   1. Lack of synacthen in your practice
   2. Lack of standardised cut-off of serum cortisol that determines adrenal adequacy.
   3. Lack of specific immunoassays to measure serum cortisol level.
   4. Lack of anti-adrenal antibodies assay, including 21-hydroxylase antibodies to diagnose primary adrenal insufficiency.
   5. Others: Please specify: ­­­­­­­­­­­_______________________________

**Management strategies**

1. How do you treat your patients with adrenal insufficiency?
   1. Hydrocortisone
   2. Cortisone acetate
   3. Prednisolone
   4. Dexamethasone
   5. Betamethasone
   6. Others: Please specify:____________________________________________
2. What dose of prednisolone tablets do you have in your country?
   1. We have prednisolone 1mg and prednisolone 5mg
   2. We have prednisolone 5mg only
   3. We have prednisolone 1mg only
   4. We have prednisolone 10mg only
   5. We have none
   6. Others: ____
3. How do you treat patients presenting with adrenal crisis in your centre?
   1. Intravenous hydrocortisone 100 mg as a bolus, followed by 50 mg 3 times a day
   2. Prednisolone 25 mg as a bolus followed by 25 mg three times a day for the next 24 hours.
   3. Dexamethasone 4 mg every 24 hours
   4. Methylprednisolone 40 mg every 24 hours
   5. Intravenous hydrocortisone 100 mg as a bolus and 200 mg over 24 hours as a continuous intravenous infusion
   6. Others: Please specify:
4. Once you have stabilised the initial adrenal crisis, how do you treat patients with adrenal insufficiency in the long term?
   1. Oral hydrocortisone 15 to 25 mg per day in divided doses.
   2. Oral prednisolone 3 to 5 mg once a day
   3. Oral cortisone acetate at 25 to 37.5 mg once daily
   4. DHEA at 25 to 50 mg once daily
   5. Others:_______________________________________
5. How do you usually adjust the dose of glucocorticoids for your stable patients with adrenal Insufficiency?
   1. Fixed dose for all patients
   2. Dose adjusted for weight/dose adjusted for body surface area
   3. Others: _________________
6. In patients who develop adrenal insufficiency due to long term exogenous steroid use, do you try to wean them off the glucocorticoid?
   1. Yes
   2. No
7. If yes, how long do you normally take to wean these patients off glucocorticoid?
   1. < 3 months
   2. 3 months to 6 months
   3. 6 months to 12 months
   4. 12 months to 24 months
   5. ≥ 24 months
   6. Others: ____
8. How would you normally manage adrenal insufficiency after stabilising the initial adrenal crisis? There are no wrong answers.  Please answer as you would do in real life.
   1. Switch to replacement dose hydrocortisone and continue this long-term
   2. Switch to replacement dose hydrocortisone and slowly wean the patient off hydrocortisone completely.
   3. If patient on prednisolone, I will reduce it to 5mg prednisolone and continue that long-term
   4. If patient on prednisolone, I will reduce prednisolone to 3mg once daily and continue this long-term
   5. If patient on prednisolone, I will reduce to prednisolone to 3mg once daily and slowly wean the patient off prednisolone completely.
   6. Others:
9. Following the recovery from steroid induced adrenal insufficiency, how will you assess the recovery of the adrenal axis?
   1. 0900 am cortisol
   2. Short synacthen test (SST)
   3. Insulin tolerance test (ITT)
   4. Glucagon stress test (GST)
   5. Metyrapone suppression Test
   6. Early morning salivary cortisone/salivary cortisol
   7. No investigations at all as I will base it on her clinical symptoms to determine if patients need more or less steroid
   8. Other (please specify)
10. What type of assays do you have in your institution for quantification of serum cortisol level?
    1. LCMS/GCMS
    2. Radioimmunoassays (RIA)
    3. Automated commercial immunoassays
       1. Abbott Architect/Alinity
       2. Beckmann Access
       3. Roche E170 Generation II
       4. Beckman Access
       5. Siemens Centaur XP
    4. I am not sure
    5. Others:

**Quality and availability of patient education**

1. How does your centre normally provide effective patient education on glucocorticoid treatment for adrenal insufficiency to prevent adrenal crisis? (please select more than one options)
   1. Leaflet with information on adrenal crisis and hospitalisation with advice to present to hospital if they have symptoms.
   2. Emergency phone number to endocrine specialist team/dedicated endocrine nurse
   3. Teaching parenteral self-administration (and partner or parents) of glucocorticoid preparation in cases of emergency (such as education on use of hydrocortisone emergency injection kit)
   4. Teaching patients on doubling dose of steroids during sick days
   5. Steroid card
   6. Others:
2. In what situations, would you advise your patients to increase their steroid dose? Choose one or more options.
   1. Having a cold, fever or having psychological distress e.g. feeling moody, exam stress bereavement or having non-specific tiredness
   2. Diarrhoea
   3. Vomiting
   4. Surgery
   5. Dental treatment
   6. Prolonged physical activity e.g. playing a long football game?
   7. Others: _________
3. Do all patients with adrenal insufficiency in your institution receive a “steroid emergency card” or a “medic alert bracelet”?
   1. Yes
   2. No
   3. If no, please specify why: ________
4. What are the perceived challenges in educating patients on adrenal insufficiency? You can choose more than one option
   1. Cultural issues
   2. Language issues
   3. Educational level of patients
   4. Lack of availability of hydrocortisone injection kit
   5. Availability of educational materials/forums/website for healthcare providers to learn about adrenal insufficiency
   6. Awareness level of healthcare providers regarding the condition
   7. Others: ____
5. What support/infrastructure would you have liked to have to help improve the education level of your patients on self-management of adrenal insufficiency? (You can select more than one option)
   1. A website on information of adrenal insufficiency
   2. Patient information leaflets
   3. More manpower such as endocrine nurses to provide education or junior doctors to delivery the service (please elaborate if possible)
   4. A registry of all patients with adrenal insufficiency to keep track of number of the crisis they have in their lifetime.
   5. Better treatment options (please elaborate if possible)
   6. A culturally appropriate guidelines catered to Asian population and the challenges faced
   7. Others:
6. If you have chosen better treatment option in question 45, please kindly elaborate what you think would be an ideal cortisol replacement (optional)
7. How likely are your patients to comply to treatment or follow up? (Please rate on the liketh scale)
   1. Drug compliance (liketh scale for likelihood of compliance)
   2. Follow up compliance (liketh scale for likelihood of compliance)
   3. Compliance with sick day rules such as steroid doses during stress/illness (liketh scale)
   4. Weaning the doses of steroids as prescribed? i.e. to reduce the dose of prednisolone form 5 mg to 4 mg and then to 3 mg if told to do so (Please rate on this rating scale)
8. What other future changes would you like to see in the management of adrenal insufficiency in Asian countries?

(Free text for patients to elaborate)
